# Supplementary material
Source: PubMed Central journal article supplement (PMC6029550)

**Prognostic impact of the absence of biallelic deletion at the TRG locus for pediatric patients with T-cell acute lymphoblastic leukemia treated on the Medical Research Council UK Acute Lymphoblastic Leukemia 2003 trial**

*Nadine Farah,<sup>1</sup> Amy A Kirkwood,<sup>2</sup> Sunniyat Rahman,<sup>1</sup> Theresa Leon,<sup>1</sup> Sarah Jenkinson,<sup>1</sup> Rosemary E. Gale,<sup>1</sup> Katharine Patrick,<sup>3</sup> Jeremy Hancock,<sup>4</sup> Sujith Samarasinghe,<sup>5</sup> David C. Linch,<sup>1</sup> Anthony V Moorman,<sup>6</sup> Nicholas Goulden,<sup>5</sup> Ajay Vora<sup>3,5</sup> and Marc R. Mansour<sup>1</sup>*

*<sup>1</sup>Department of Haematology, UCL Cancer Institute, London; <sup>2</sup>Cancer Research UK & UCL Cancer Trials Centre, UCL, London; <sup>3</sup>Department of Haematology, Sheffield Children's Hospital; <sup>4</sup>Bristol Genetics Laboratory, Southmead Hospital; <sup>5</sup>Department of Haematology, Great Ormond Street Hospital and <sup>6</sup>Leukaemia Research Cytogenetics Group, Northern Institute for Cancer Research, Newcastle, UK*

*Correspondence: [m.mansour@ucl.ac.uk](mailto:m.mansour@ucl.ac.uk)  
doi:10.3324/haematol.2017.185801*

## SUPPLEMENTARY INFORMATION

### Patient cohort

Diagnostic samples from previously untreated T-ALL patients enrolled on the MRC UKALL2003 trial were analyzed. The trial, registered at <http://www.controlled-trials.com> under the ISRCTN number 07355119, opened in October 2003 for patients aged 1-18 years. The upper age limit of the trial was increased in September 2006 to 20 years and in June 2008 to 25 years of age. Samples obtained at diagnosis from 152 of the 393 (39%) patients with T-ALL were available for analysis. Ethical approval for the trial was obtained previously from the Scottish Multi-Centre Research Ethics Committee, and samples were collected with informed consent according to the Declaration of Helsinki.

Details of the trial protocol are as published<sup>1</sup> and are outlined in Supplementary Figures S5-6. At trial entry, patients with National Cancer Institute (NCI) standard risk (<10 years of age and white cell count [WCC] <50x10<sup>9</sup>/L) were assigned to regimen A while NCI high risk patients (≥10 years and/or WCC ≥50x10<sup>9</sup>/L) received regimen B. Patients <16 years with a slow early response (≥25% blasts in the day 15 or 8 bone marrow for regimens A or B respectively) and all patients with high risk cytogenetics (*KMT2A* [*MLL*] and *TCF3-HLF* fusions, near haploidy, low hypodiploidy, and iAMP21) were assigned to regimen C. MRD was evaluated by real-time quantitative PCR analysis of immunoglobulin and T-cell receptor gene rearrangements with a quantitative range of 0.01% as defined by the European MRD Study Group.<sup>2</sup> Patients with undetectable MRD at the end of induction (EOI, day 29) and before interim maintenance were classified as MRD low risk, as were

those who had detectable EOI MRD (<0.01%) but undetectable MRD before the start of interim maintenance. MRD low risk patients were eligible for treatment reduction randomization. Patients with EOI MRD  $\geq$ 0.01% were classified as MRD high risk and were eligible for treatment intensification randomization (Figure S5).

## **Materials and Methods**

### **Samples**

Whole-Genome-Amplified (WGA) diagnostic genomic DNA (gDNA) from patient samples was as previously prepared.<sup>3</sup>

### **qPCR assay**

The quantitative polymerase chain reaction (qPCR) assay was as previously described,<sup>4</sup> and evaluated the presence or absence of an amplicon within the intron between the V and J regions of the *TRG* locus at chromosome 7p14. The primers (Forward: 5'-CATCCTCACTTTCCTGCTTCTTC-3'; Reverse: 5'-CCAAGGTGAATCCCTACATGCT-3') amplified an 87 base pair (bp) amplicon 5089 bp from the 3' end of the *TRGV11* pseudoexon and 10123 bp away from the 5' end of *TRGJP1* exon. The reference gene *ANLN* lies 1.9Mb downstream of *TRG* at 7p15-14, and the primers (Forward: 5'-AAATTCTGCCCTTGCTTGTTT-3'; Reverse: 5'-GAAAGCAACCACAGAGAATATGTAAGTAA-3') amplified an 89 bp product.

25 $\mu$ l PCR reactions were set up as follows: 0.5 $\mu$ l of each forward and reverse primer (either *TRG* or *ANLN*) was added at 0.2 $\mu$ M, 12.5 $\mu$ l 2x concentrated ready-to-use FastStart Universal SYBR Green Master reaction mix (ROX) (Roche, 2008), 2 $\mu$ l genomic DNA template, and 9.5 $\mu$ l nuclease-free water. Samples were analyzed

in triplicate for each primer pair. The reactions were run on a Mastercycler epgradient S thermocycler (Eppendorf) at 95°C for 10mins, followed by 40 cycles of 95°C for 15 seconds and 60°C for 1 min for each cycle. CT (cycling time) values were obtained from the Mastercycler ep Realplex software.

Standard curves using dilutions of gDNA from the non-leukemic cell line HEK293T that does not have a rearrangement of the *TRG* locus showed that the primer pair efficiencies were very similar to each other ( $E=1.84$  and  $1.817$  for *TRG* and *ANLN* respectively). The *ANLN* primer pair efficiencies were also validated using gDNA from Jurkat cells, a non-early T cell precursor cell line that does have a rearrangement of the *TRG* gene.

Mean and standard deviation (SD) between the CT values of each sample for each primer pair were calculated. If the SD between CT values of the replicates for the PCR reaction of the reference gene, *ANLN*, was  $>0.5$ , then the reactions were discarded and all the reactions for that patient sample were repeated.

*TRG:ANLN* fold change was calculated according to the comparative  $\Delta\Delta CT$  method using HEK293T gDNA as the calibrator. Each run included the positive control (HEK293T gDNA) and a negative control (nuclease-free water) for each primer pair. The SD of the HEK293T CT values for each of the primer pairs showed minimal variability across the runs ( $n=14$ ; *TRG*: mean CT value 23.7, range 23.4-23.9, SD 0.1; *ANLN*: mean CT value 23.8, range 23.6-23.9, SD 0.1). Therefore, the CT results of the HEK293T sample of each run was used as the calibrator value for the fold change calculations for samples on that run.

### **Comparison of WGA and non-WGA gDNA fold change**

TRG:ANLN fold change calculated by the method above using WGA gDNA samples was validated using the same assay in the corresponding non-WGA gDNA samples available from 26 patients, which included patients with fold changes that covered the entire range (mean fold change 0.01–0.94). There was good agreement between the fold change results from the 2 types of samples ( $R^2=0.92$ ; Figure S2A), with a bias of -0.023 and an agreement interval from -0.201 to 0.155, in which 95% of the differences between the 2 fold changes should lie (Figure S2B). One patient with ABD and three patients with non-ABD in the WGA samples were found to be indeterminate by qPCR assay in the corresponding non-WGA samples. However, none of the patients had their ABD status change from ABD to non-ABD, and vice-versa, when comparing the WGA and the corresponding non-WGA results.

### **Validation of fold change using a different reference gene**

The fold change results that were indeterminate by the qPCR assay above (TRG:ANLN fold change 0.26-0.49) were validated using a different reference gene encoding the mitochondrial protein Cytochrome c Oxidase Assembly factor 1 (*COA1*), which lies 4MB upstream of the *TRG* locus, to abrogate the possibility that abnormalities of the *ANLN* reference gene itself may have contributed to the indeterminate fold change calculation. The *COA1* primers (Forward: 5'-GGAAACTGGGTTGCAGGAG-3'; Reverse: 5'-AGAAGACCCAGCTTGCTTCT-3') amplified a 105bp product.

*TRG* and *COA1* assays were performed in triplicate using the same PCR reaction reagents, calibrator and conditions as described above and the TRG:COA1 fold

change calculated. Standard curves using dilutions of gDNA from HEK293T cells were set up using the *COA1* primers and the efficiency was comparable to that of the *TRG* primers ( $E=1.96$  and  $E=1.84$  for *COA1* and *TRG* respectively).

The TRG:COA1 fold change led to the same ABD status assignment as that of the TRG:ANLN fold change for 7 patients that had informative TRG:ANLN fold change results (data not shown). The TRG:COA1 fold change results for 15 patients with indeterminate TRG:ANLN did not change the ABD assignment from ABD to non-ABD or vice versa, although 3 patients had fold changes in this assay that varied from those of the TRG:ANLN assay only across the thresholds of 0.26-0.49 of the indeterminate range (Figure S2C). As a result of the inconclusive fold change results from both the TRG:ANLN and TRG:COA1 assays for these samples, these patients were assigned the ABD indeterminate status.

### **SNP array analysis**

WGA gDNA samples were previously analyzed using the Infinium CytoSNP-850K Beadchip array (Illumina, Essex, UK).<sup>3</sup> Log-R intensities and B-allele frequencies for each of the 62 SNP markers across the region hg19 chr7:38288270-38385938 which includes the *TRG* locus were assessed independently by 4 individuals and the *TRG* locus deletion status was scored as no or heterozygous deletion (ABD), or homozygous deletion (non-ABD).

### **Statistical Analysis**

Survival curves were plotted using Kaplan-Meier analysis for overall survival (time from the start of treatment until death), event-free survival (time to relapse,

secondary tumor or death, whichever came first) and relapse-free survival (time to relapse in those who achieved remission). Patients who died in remission were censored. Those who did not have an event were censored at the date last seen. Comparisons between groups were carried out using Cox regression and the log rank test. Differences between the median Day 29 MRD results in the ABD and non-ABD groups was compared using the Wilcoxon Mann-Whitney test. Statistical analysis was conducted using STATA version 14.2 (STATA CORP, Texas), MRD scatter plot drawn using GraphPad Prism 6 (GraphPad Software, Inc, California).

## References

1. Qureshi A, Mitchell C, Richards S, Vora A, Goulden N. Asparaginase-related venous thrombosis in UKALL 2003- re-exposure to asparaginase is feasible and safe. *Brit J Haematol.* 2010; 149(3): 410-413.
2. van der Velden VHJ, Cazzaniga G, Schrauder A, et al. Analysis of minimal residual disease by Ig/TCR gene rearrangements: guidelines for interpretation of real-time quantitative PCR data. *Leukemia.* 2007; 21(4): 604-611.
3. Jenkinson S, Kirkwood AA, Goulden N, Vora A, Linch DC, Gale RE. Impact of PTEN abnormalities on outcome in pediatric patients with T-cell acute lymphoblastic leukemia treated on the MRC UKALL2003 trial. *Leukemia.* 2016; 30(1): 39-47.
4. Gutierrez A, Dahlberg SE, Neuberg DS, et al. Absence of biallelic TCRgamma deletion predicts early treatment failure in pediatric T-cell acute lymphoblastic leukemia. *J Clin Oncol.* 2010; 28(24): 3816-3823.
5. Vora A, Goulden N, Wade R, et al. Treatment reduction for children and young adults with low-risk acute lymphoblastic leukaemia defined by minimal residual disease (UKALL 2003): A randomized controlled trial. *Lancet Oncol.* 2013; 14(3): 199-209.
6. O'Connor D, Enshaei A, Bartram J, et al. Genotype-Specific Minimal Residual Disease Interpretation Improves Stratification in Pediatric Acute Lymphoblastic Leukemia. *J Clin Oncol.* 2018; 36(1):34-43.



## Supplementary Tables

**Table S1: Comparison of the baseline characteristics, treatment allocation and response of T-ALL patients that were (n=152) or were not (n=241) included in the study.**

|                                                | Patients with samples | Patients without samples | <i>P</i>          |
|------------------------------------------------|-----------------------|--------------------------|-------------------|
|                                                | N=152                 | N=241                    |                   |
| <b>Baseline characteristics</b>                |                       |                          |                   |
| <b>Sex, N (%)</b>                              |                       |                          |                   |
| Male                                           | 117 ( 77.0)           | 168 ( 69.7)              | 0.12              |
| Female                                         | 35 ( 23.0)            | 73 ( 30.3)               |                   |
| <b>WBC count (x10<sup>9</sup>/L), N (%)</b>    |                       |                          |                   |
| <50                                            | 48 ( 31.6)            | 95 ( 39.4)               | 0.12              |
| ≥50                                            | 104 ( 68.4)           | 146 ( 60.6)              |                   |
| <b>Age, N (%)</b>                              |                       |                          |                   |
| <10 years                                      | 82 ( 53.9)            | 107 ( 44.4)              | 0.07              |
| ≥10 years                                      | 70 ( 46.1)            | 134 ( 55.6)              |                   |
| <b>NCI risk group, N (%)</b>                   |                       |                          |                   |
| Standard                                       | 19 ( 12.5)            | 40 ( 16.6)               | 0.27              |
| High                                           | 133 ( 87.5)           | 201 ( 83.4)              |                   |
| <b>CNS disease at diagnosis, N (%)</b>         |                       |                          |                   |
| No                                             | 144 ( 94.7)           | 225 ( 93.4)              | 0.58              |
| Yes                                            | 8 ( 5.3)              | 16 ( 6.6)                |                   |
| <b>Final Treatment Allocation and Response</b> |                       |                          |                   |
| <b>Final treatment given, N (%)</b>            |                       |                          |                   |
| A                                              | 14 ( 9.2)             | 30 ( 12.4)               | 0.25              |
| B                                              | 87 ( 57.2)            | 118 ( 49.0)              |                   |
| C                                              | 51 ( 33.6)            | 93 ( 38.6)               |                   |
| <b>Slow early Response, N (%)</b>              |                       |                          |                   |
| No                                             | 97 ( 63.8)            | 148 ( 61.4)              | 0.55 <sup>#</sup> |
| Yes                                            | 37 ( 24.3)            | 55 ( 22.8)               |                   |
| Unknown <sup>*</sup>                           | 18 ( 11.8)            | 38 ( 15.8)               |                   |
| <b>MRD, N (%)</b>                              |                       |                          |                   |
| Negative (<0.01% positive cells)               | 50 ( 32.9)            | 70 ( 29.0)               | 0.25 <sup>§</sup> |
| Positive (≥0.01% positive cells)               | 67 ( 44.1)            | 97 ( 40.2)               |                   |
| Indeterminate <sup>ψ</sup>                     | 35 ( 23.0)            | 74 ( 30.7)               |                   |

*P* values derived using Chi-squared tests. \*Patients without bone marrow results at day 8 or 15 (assumed to have rapid early response for treatment escalation decision) and two patients with conflicting slow early response data and bone marrow results. #Excluding the unknown group: *P* = 0.92. §Excluding the indeterminate group: *P* = 0.89. ψIncludes samples where there were either no targets for MRD assessment or the targets were not sensitive enough, and samples where MRD was either not analysed or was unevaluable due to the sample being inadequate or having missing data. WBC, white blood cell count; NCI, National Cancer Institute, CNS, central nervous system; MRD, minimal residual disease.

**Table S2: Time-to-event outcomes comparing the groups with and without samples for ABD analysis.**

|                 | Events/n | HR (95% CI)        | P     | 5-year rate (95% CI) |
|-----------------|----------|--------------------|-------|----------------------|
| <b>EFS</b>      |          |                    |       |                      |
| Without samples | 59/241   | 1.00               | 0.075 | 76.9% (71.0 – 81.8)  |
| With samples    | 27/152   | 0.66 (0.42 – 1.05) |       | 84.2% (77.4 – 89.1)  |
| <b>RFS</b>      |          |                    |       |                      |
| Without samples | 37/239   | 1.00               | 0.41  | 84.9% (79.4 – 89.0)  |
| With samples    | 20/151   | 0.80 (0.46 – 1.38) |       | 87.2% (80.7 – 91.6)  |
| <b>OS</b>       |          |                    |       |                      |
| Without samples | 43/241   | 1.00               | 0.074 | 82.8% (77.4 – 87.0)  |
| With samples    | 18/152   | 0.61 (0.35 – 1.05) |       | 89.5% (83.4 – 93.4)  |

*P* values calculated using the log rank test. EFS, Event-Free Survival; RFS, Relapse-Free Survival; OS, Overall Survival; HR, Hazard Ratio; CI, Confidence Interval.

**Table S3. Comparison of baseline characteristics, treatment allocation, response and molecular characterisation of patients with definitive and indeterminate qPCR results for the ABD assay.**

|                                                 | qPCR result<br>N=133 | Indeterminate qPCR result<br>N=19 | P                  |
|-------------------------------------------------|----------------------|-----------------------------------|--------------------|
| <b>Baseline characteristics</b>                 |                      |                                   |                    |
| <b>Sex, N (%)</b>                               |                      |                                   |                    |
| Male                                            | 104 ( 78.2)          | 13 ( 68.4)                        | 0.38*              |
| Female                                          | 29 ( 21.8)           | 6 ( 31.6)                         |                    |
| <b>WBC count (x10<sup>9</sup> per L), N (%)</b> |                      |                                   |                    |
| <50                                             | 39 ( 29.3)           | 9 ( 47.4)                         | 0.11               |
| ≥50                                             | 94 ( 70.7)           | 10 ( 52.6)                        |                    |
| <b>Age, N (%)</b>                               |                      |                                   |                    |
| <10 years                                       | 72 ( 54.1)           | 10 ( 52.6)                        | 0.90               |
| ≥10 years                                       | 61 ( 45.9)           | 9 ( 47.4)                         |                    |
| <b>NCI risk group, N (%)</b>                    |                      |                                   |                    |
| Standard                                        | 14 ( 10.5)           | 5 ( 26.3)                         | 0.066*             |
| High                                            | 119 ( 89.5)          | 14 ( 73.7)                        |                    |
| <b>CNS disease at diagnosis, N (%)</b>          |                      |                                   |                    |
| No                                              | 125 ( 94.0)          | 19 (100.0)                        | 0.60*              |
| Yes                                             | 8 ( 6.0)             | 0                                 |                    |
| <b>Final Treatment Allocation and Response</b>  |                      |                                   |                    |
| <b>Final treatment given, N (%)</b>             |                      |                                   |                    |
| A                                               | 11 ( 8.3)            | 3 ( 15.8)                         | 0.53*              |
| B                                               | 76 ( 57.1)           | 11 ( 57.9)                        |                    |
| C                                               | 46 ( 34.6)           | 5 ( 26.3)                         |                    |
| <b>Slow early Response, N (%)</b>               |                      |                                   |                    |
| No                                              | 85 ( 63.9)           | 12 ( 63.2)                        | >0.99 <sup>§</sup> |
| Yes                                             | 32 ( 24.1)           | 5 ( 26.3)                         |                    |
| Unknown <sup>#</sup>                            | 16 ( 12.0)           | 2 ( 10.5)                         |                    |
| <b>MRD, N (%)</b>                               |                      |                                   |                    |
| Negative (<0.01% positive cells)                | 41 ( 30.8)           | 9 ( 47.4)                         | 0.34 <sup>‡</sup>  |
| Positive (≥0.01% positive cells)                | 61 ( 45.9)           | 6 ( 31.6)                         |                    |
| Indeterminate <sup>θ</sup>                      | 31 ( 23.3)           | 4 ( 21.1)                         |                    |
| <b>Molecular Characterisation</b>               |                      |                                   |                    |
| <b>NOTCH1/FBXW7, N (%)</b>                      |                      |                                   |                    |
| Wild type                                       | 47 (35.3)            | 6 (31.6)                          | 0.20*              |
| Single Mutant                                   | 50 (37.6)            | 11 (57.9)                         |                    |
| Double Mutant                                   | 36 (27.1)            | 2 (10.5)                          |                    |
| <b>PTEN, N (%)</b>                              |                      |                                   |                    |
| Wild type                                       | 94 (75.8)            | 17 (94.4)                         | 0.12*              |
| Mutant                                          | 30 (24.2)            | 1 (5.6)                           |                    |
| <b>RAS, N (%)</b>                               |                      |                                   |                    |
| Wild type                                       | 120 (90.2)           | 17 (89.5)                         | >0.99              |
| Mutant                                          | 13 (9.8)             | 2 (10.5)                          |                    |

P values derived using Chi-squared tests unless otherwise indicated. \*Fisher's exact test. <sup>#</sup>Patients without bone marrow results at day 8 or 15 (assumed to be RER for treatment escalation) and one patient with conflicting slow early response data and bone marrow results. <sup>§</sup>Excluding the unknown group: P > 0.99. <sup>‡</sup>Excluding the indeterminate group: P = 0.15. <sup>θ</sup>Includes samples where there were either no targets for MRD assessment or the targets were not sensitive enough, and samples where MRD was either not analysed or was unevaluable due to the sample being inadequate or having missing data. WBC, white blood cell count; NCI, National Cancer Institute, CNS, central nervous system; MRD, minimal residual disease.

**Table S4: Time-to-event outcomes comparing the groups with definitive and indeterminate qPCR results for the ABD assay.**

|                    | Events/n | HR (95% CI)        | <i>P</i> | 5-year rate (95% CI) |
|--------------------|----------|--------------------|----------|----------------------|
| <b>EFS</b>         |          |                    |          |                      |
| qPCR result        | 24/133   | 1.00               | 0.81     | 84.2% (76.8 – 89.4)  |
| Indeterminate qPCR | 3/19     | 0.86 (0.26 – 2.87) |          | 84.2% (58.7 – 94.6)  |
| <b>RFS</b>         |          |                    |          |                      |
| qPCR result        | 17/132   | 1.00               | 0.75     | 87.6% (80.6 – 92.2)  |
| Indeterminate qPCR | 3/19     | 1.22 (0.36 – 4.17) |          | 84.2% (58.7 – 94.6)  |
| <b>OS</b>          |          |                    |          |                      |
| qPCR result        | 16/133   | 1.00               | 0.83     | 89.5% (82.9 – 93.6)  |
| Indeterminate qPCR | 2/19     | 0.85 (0.20 – 3.71) |          | 89.5% (64.1 – 97.3)  |

*P* values calculated using the log rank test. EFS, Event-Free Survival; RFS, Relapse-Free Survival; OS, Overall Survival; HR, Hazard Ratio; CI, Confidence Interval.

**Table S5: Time-to-event outcomes comparing the ABD and non-ABD groups.**

|            | Events/n | HR (95% CI)        | <i>P</i> | 5-year rate (95% CI) |
|------------|----------|--------------------|----------|----------------------|
| <b>EFS</b> |          |                    |          |                      |
| Non-ABD    | 17/110   | 1.00               | 0.09     | 85.4% (79.5 – 92.3)  |
| ABD        | 7/23     | 2.12 (0.88 – 5.12) |          | 77.3% (55.4 – 90.3)  |
| <b>RFS</b> |          |                    |          |                      |
| Non-ABD    | 13/110   | 1.00               | 0.42     | 88.8% (81.1 – 93.5)  |
| ABD        | 4/22     | 1.58 (0.52 – 4.86) |          | 81.8% (58.5 – 92.8)  |
| <b>OS</b>  |          |                    |          |                      |
| Non-ABD    | 12/110   | 1.00               | 0.37     | 90.0% (82.7 – 94.3)  |
| ABD        | 4/23     | 1.67 (0.54 – 5.17) |          | 87.0% (64.8 – 95.6)  |

*P* values calculated using the log rank test. EFS, Event-Free Survival; RFS, Relapse-Free Survival; OS, Overall Survival; HR, Hazard Ratio; CI, Confidence Interval.

**Table S6: Relapse-free survival comparing the ABD and non-ABD groups treated on Regimens A/B and C.**

|                    | Events/n | HR (95% CI)        | <i>P</i> | 5-year rate (95% CI) |
|--------------------|----------|--------------------|----------|----------------------|
| <b>Regimen A/B</b> |          |                    |          |                      |
| Non-ABD            | 7/75     | 1.00               | 0.31     | 91.9% (82.8 – 96.3)  |
| ABD                | 0/11     | -                  |          | 100%                 |
| <b>Regimen C</b>   |          |                    |          |                      |
| Non-ABD            | 6/35     | 1.00               | 0.21     | 82.1% (64.4 – 91.6)  |
| ABD                | 4/11     | 2.19 (0.62 – 7.78) |          | 63.6% (29.7 – 84.5)  |

*P* values calculated using the log rank test. HR, Hazard Ratio; CI, Confidence Interval.

## **Supplementary Figure Legends**

**Figure S1. Kaplan-Meier survival curves of the patients included or not included in the study.** (A) Overall Survival, (B) Event-Free Survival, (C) Relapse-Free Survival.

**Figure S2. Validation of the TRG:ANLN qPCR assay.** (A) Comparison of results obtained using WGA and Non-WGA samples from 26 patients with available material. (B) Bland-Altman plot showing the differences between the TRG:ANLN WGA and non-WGA results plotted against the mean of each pair of fold changes. The shaded area shows the agreement interval in which 95% of the differences are expected to lie. (C) TRG:ANLN and TRG:COA1 fold changes for diagnostic WGA samples from 15 patients with indeterminate ABD status by TRG:ANLN fold change.

**Figure S3. Kaplan-Meier survival curves of the patients with definitive and indeterminate qPCR results.** (A) Overall Survival, (B) Event-Free Survival, (C) Relapse-Free Survival.

**Figure S4. Kaplan-Meier survival curves grouped according to ABD status for patients on different treatment regimens.** Relapse-Free Survival for patients on (A) Regimen C, (B) Regimen A or B, and (C) those with positive MRD regardless of treatment regimen.

**Figure S5. Schematic diagram of the UKALL2003 trial protocol.** (A) Treatment intensity decision points, (B) Randomization arms of the trial based on MRD

analysis. Slow Early Response defined as  $\geq 25\%$  blasts in the Day 15 bone marrow for Regimen A and Day 8 marrow for Regimen B; High Risk Cytogenetics includes *KMT2A [MLL]* and *TCF3-HLF* fusions, near haploidy, low hypodiploidy, and iAMP21; MRD positive defined as  $\geq 0.01\%$  positive cells and MRD negative as  $< 0.01\%$  positive cells; MRD indeterminate includes samples with no targets for MRD assessment or targets were present but not sensitive enough, and samples where MRD was either not analysed or was not evaluable due to the sample being inadequate or having missing data. Abbreviations: ALL, Acute Lymphoblastic Leukemia; MRD, Minimal Residual Disease; WCC, White Cell Count.

**Figure S6. Schematic diagram of the UKALL2003 treatment regimens A, B and**

**C. Regimen A:** 3 drug induction with vincristine, dexamethasone, asparaginase followed by consolidation with daily mercaptopurine and central nervous system (CNS)-directed therapy with weekly intrathecal methotrexate. Interim Maintenance (IM): daily mercaptopurine, weekly methotrexate, monthly vincristine and corticosteroid pulses; Delayed Intensification (DI): asparaginase, vincristine, dexamethasone, doxorubicin, cyclophosphamide and cytarabine; Continuing Therapy: oral mercaptopurine and methotrexate, monthly vincristine, corticosteroid pulses, and intrathecal methotrexate every 3 months. **Regimen B:** 4 drug induction: daunorubicin in addition to drugs used in regimen A induction. Consolidation phase as in Regimen A with the addition of BFM, Berlin Frankfurt Munster (4 weeks of cyclophosphamide and cytarabine). **Regimen C:** Augmented consolidation by addition of 4 doses of vincristine and 2 doses of pegylated asparaginase during BFM consolidation. Capizzi maintenance as interim maintenance consisted of escalating doses of intravenous methotrexate without



folinic acid rescue, and vincristine and pegylated asparaginase. Abbreviations: MRD, minimal residual disease; CNS, central nervous system; IM, interim maintenance; DI, delayed intensification; BFM, Berlin Frankfurt Munster.

Further treatment regimen details available at Vora et al<sup>5</sup> and O'Connor et al.<sup>6</sup>

**Figure S1**

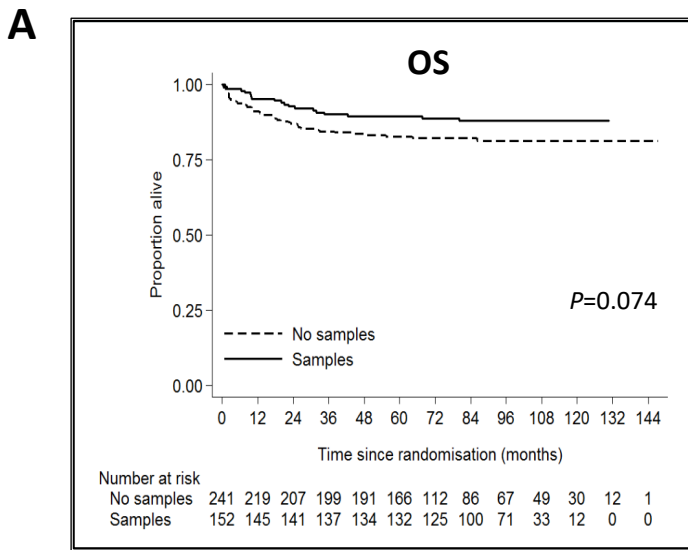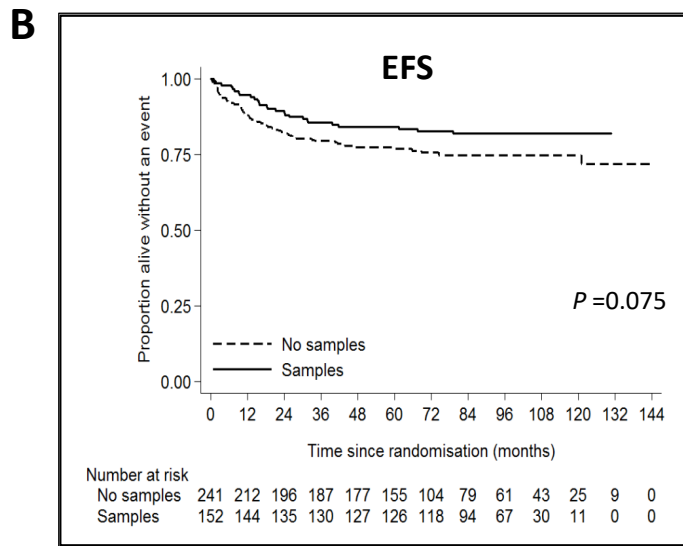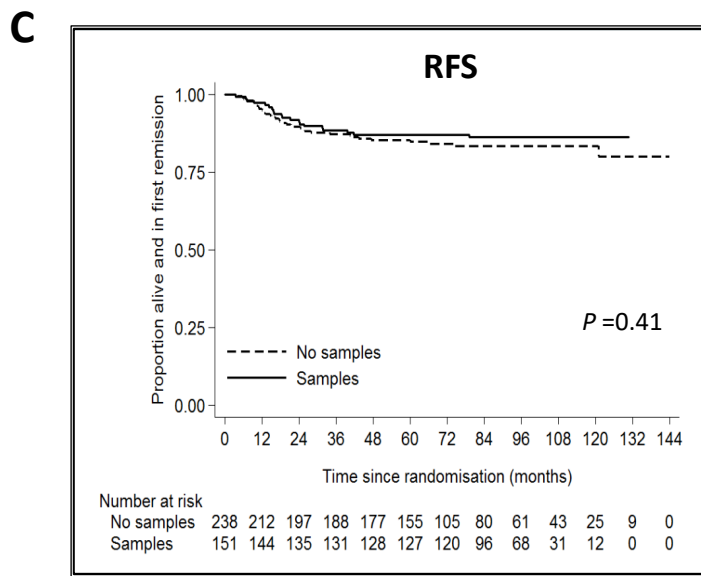

Figure S2

A

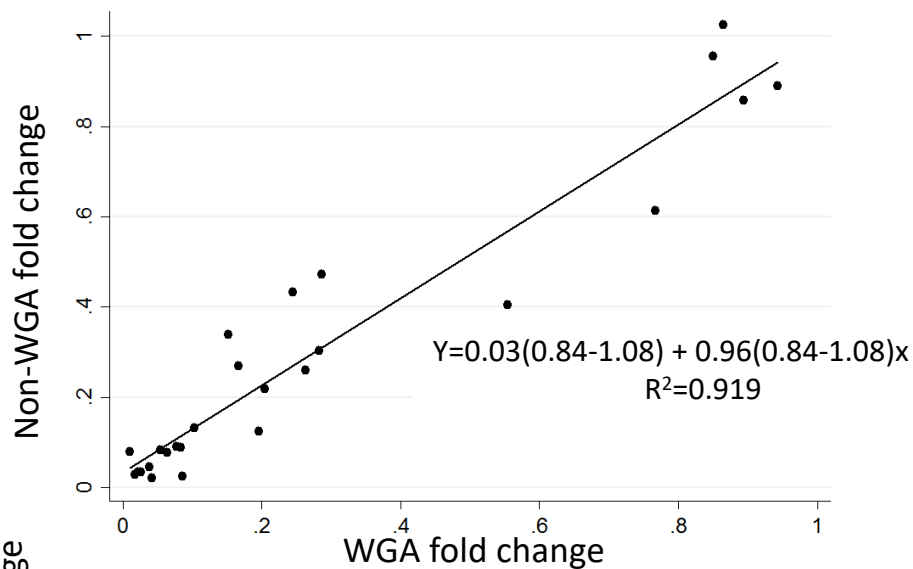

B

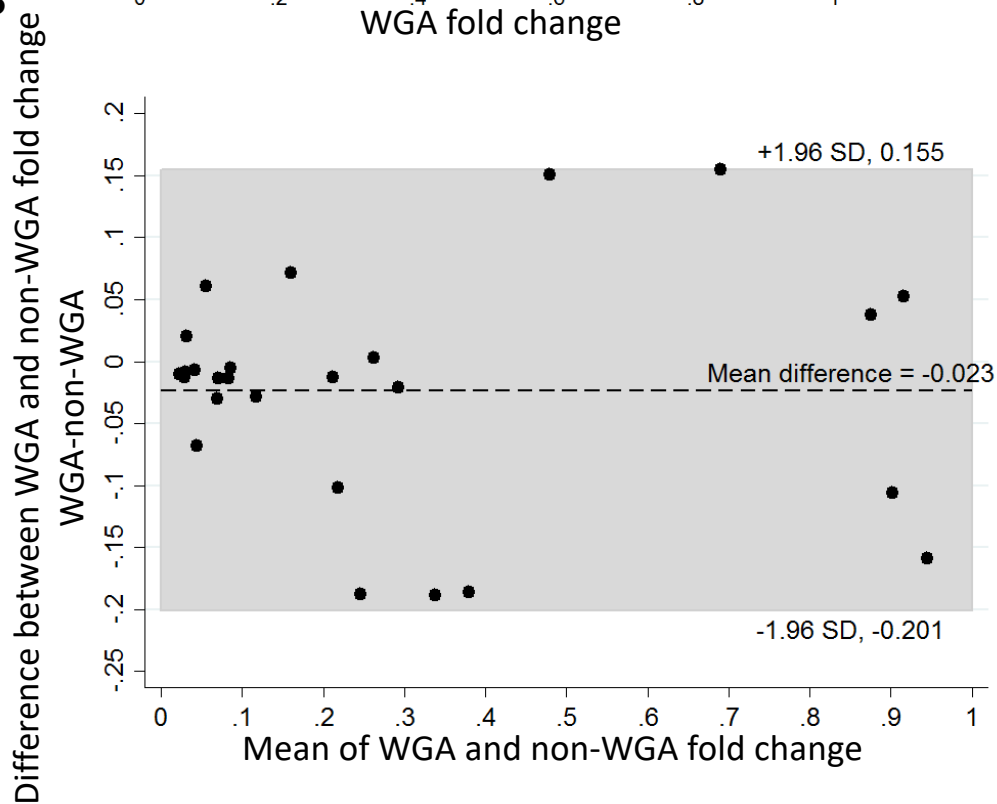

C

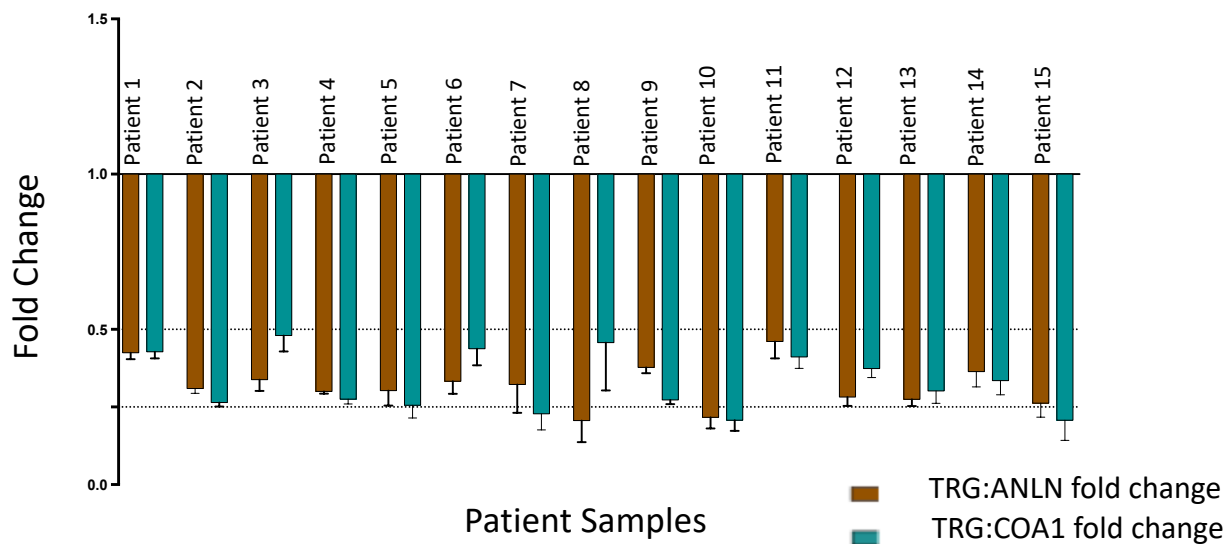

**Figure S3**

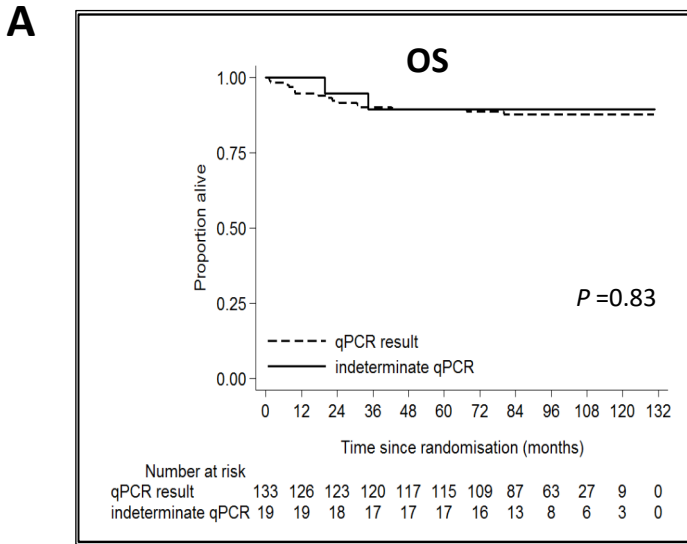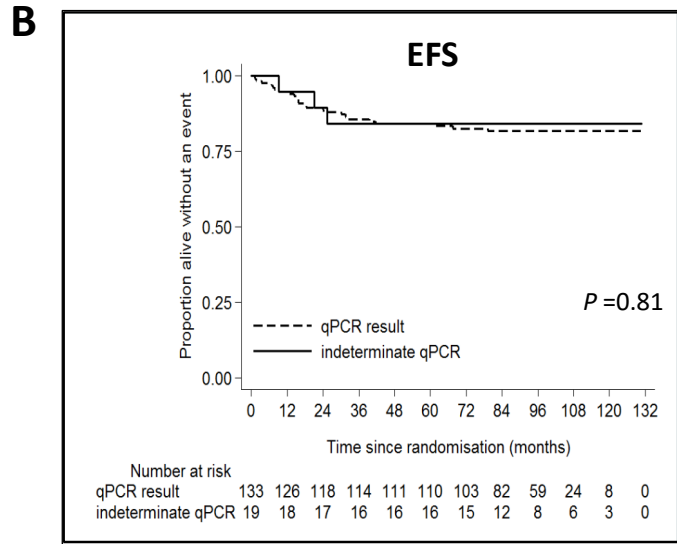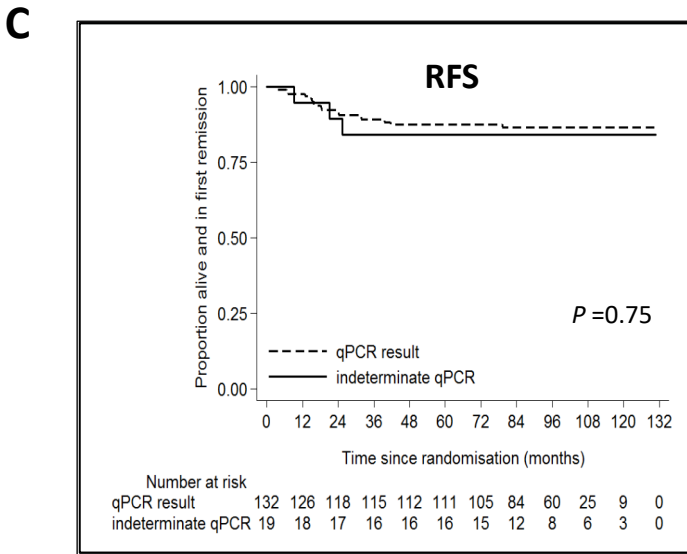

**Figure S4**

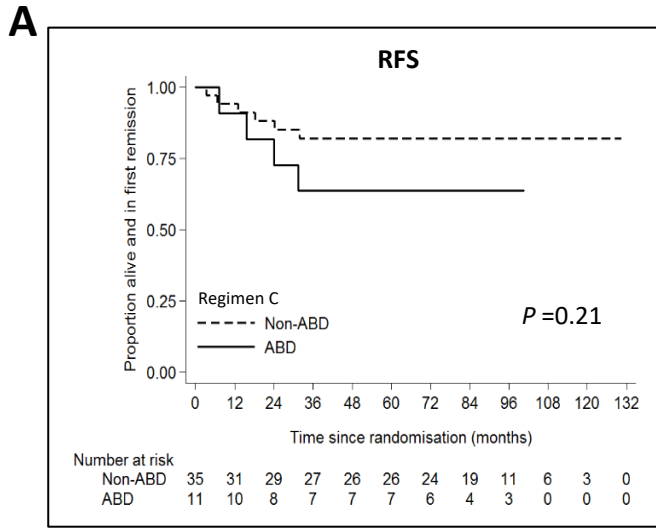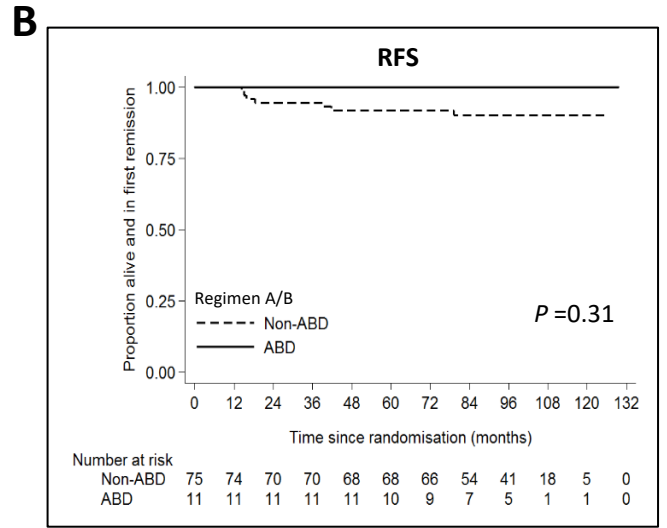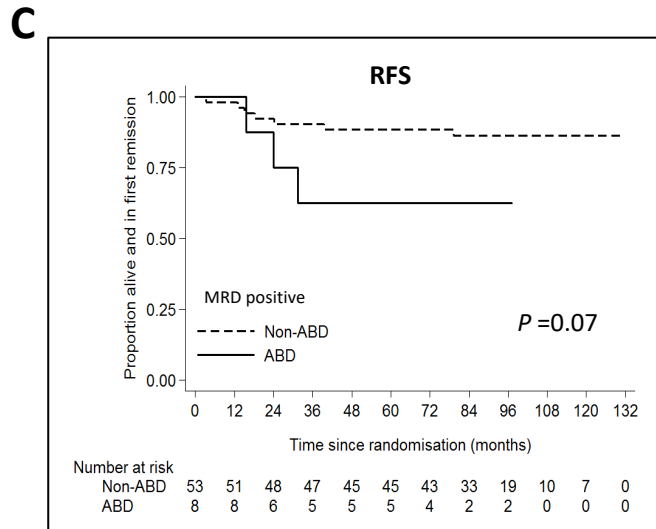

Figure S5

A

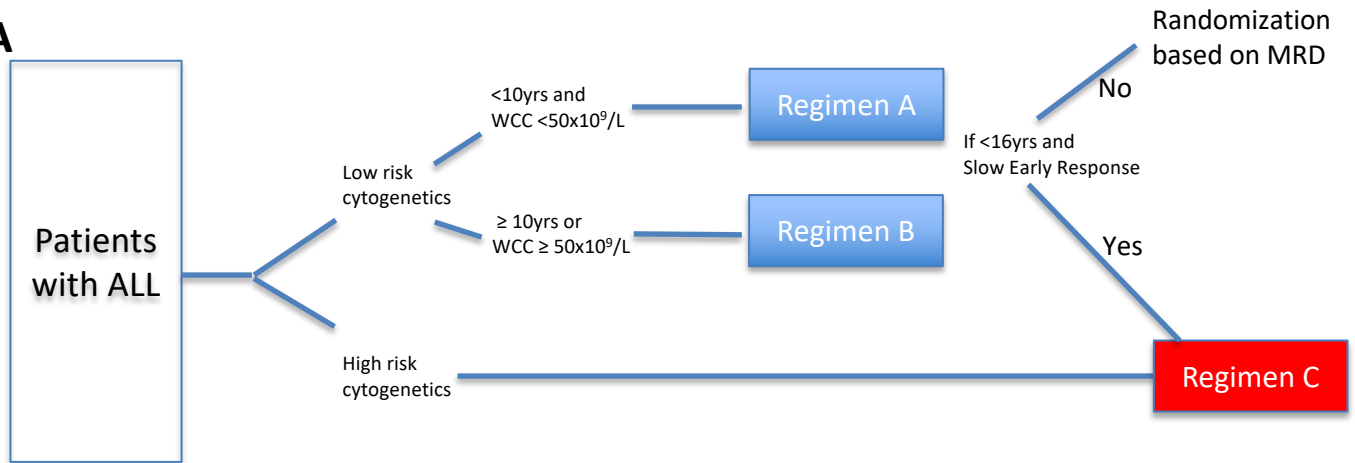

B

**Treatment Intensity Decision points**

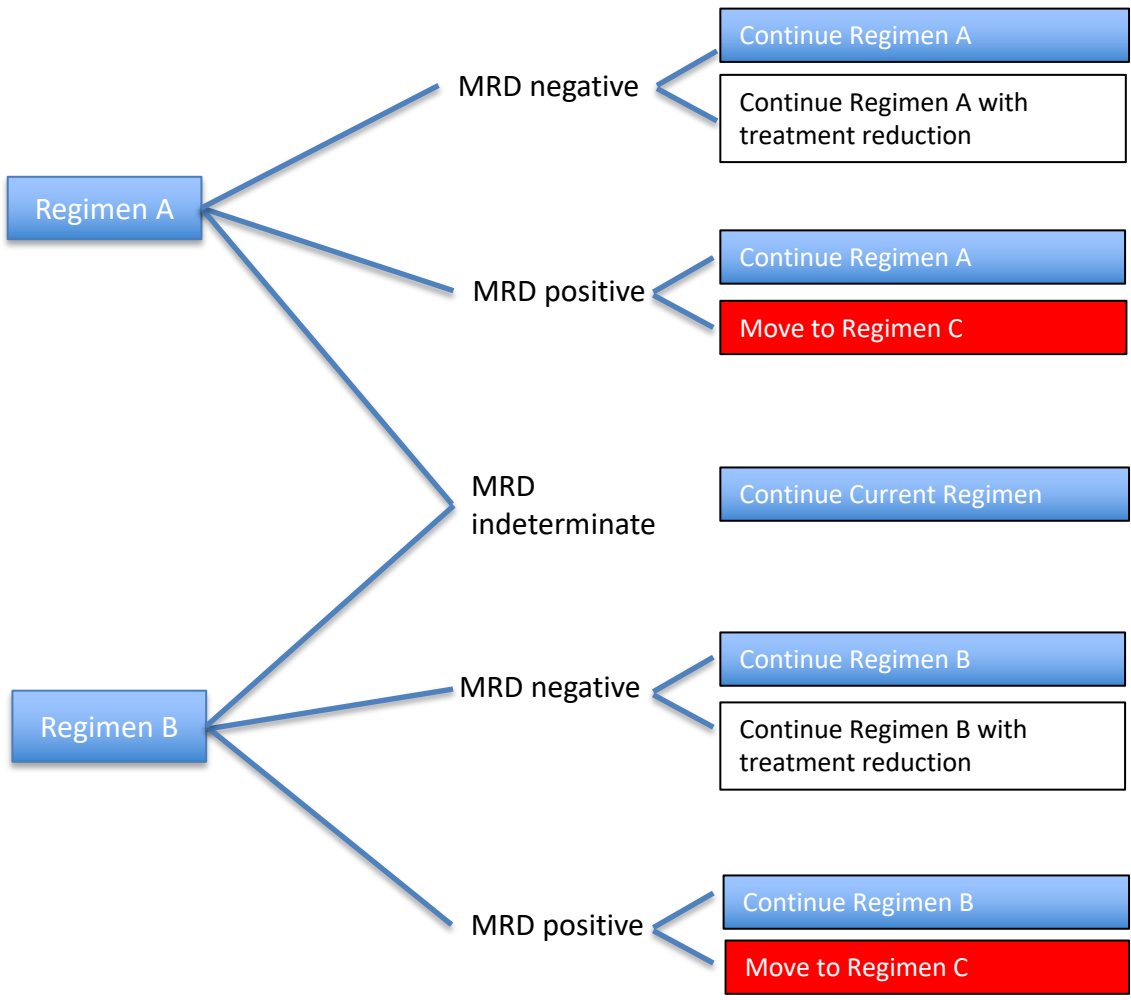

**Randomization based on MRD**

**Figure S6**

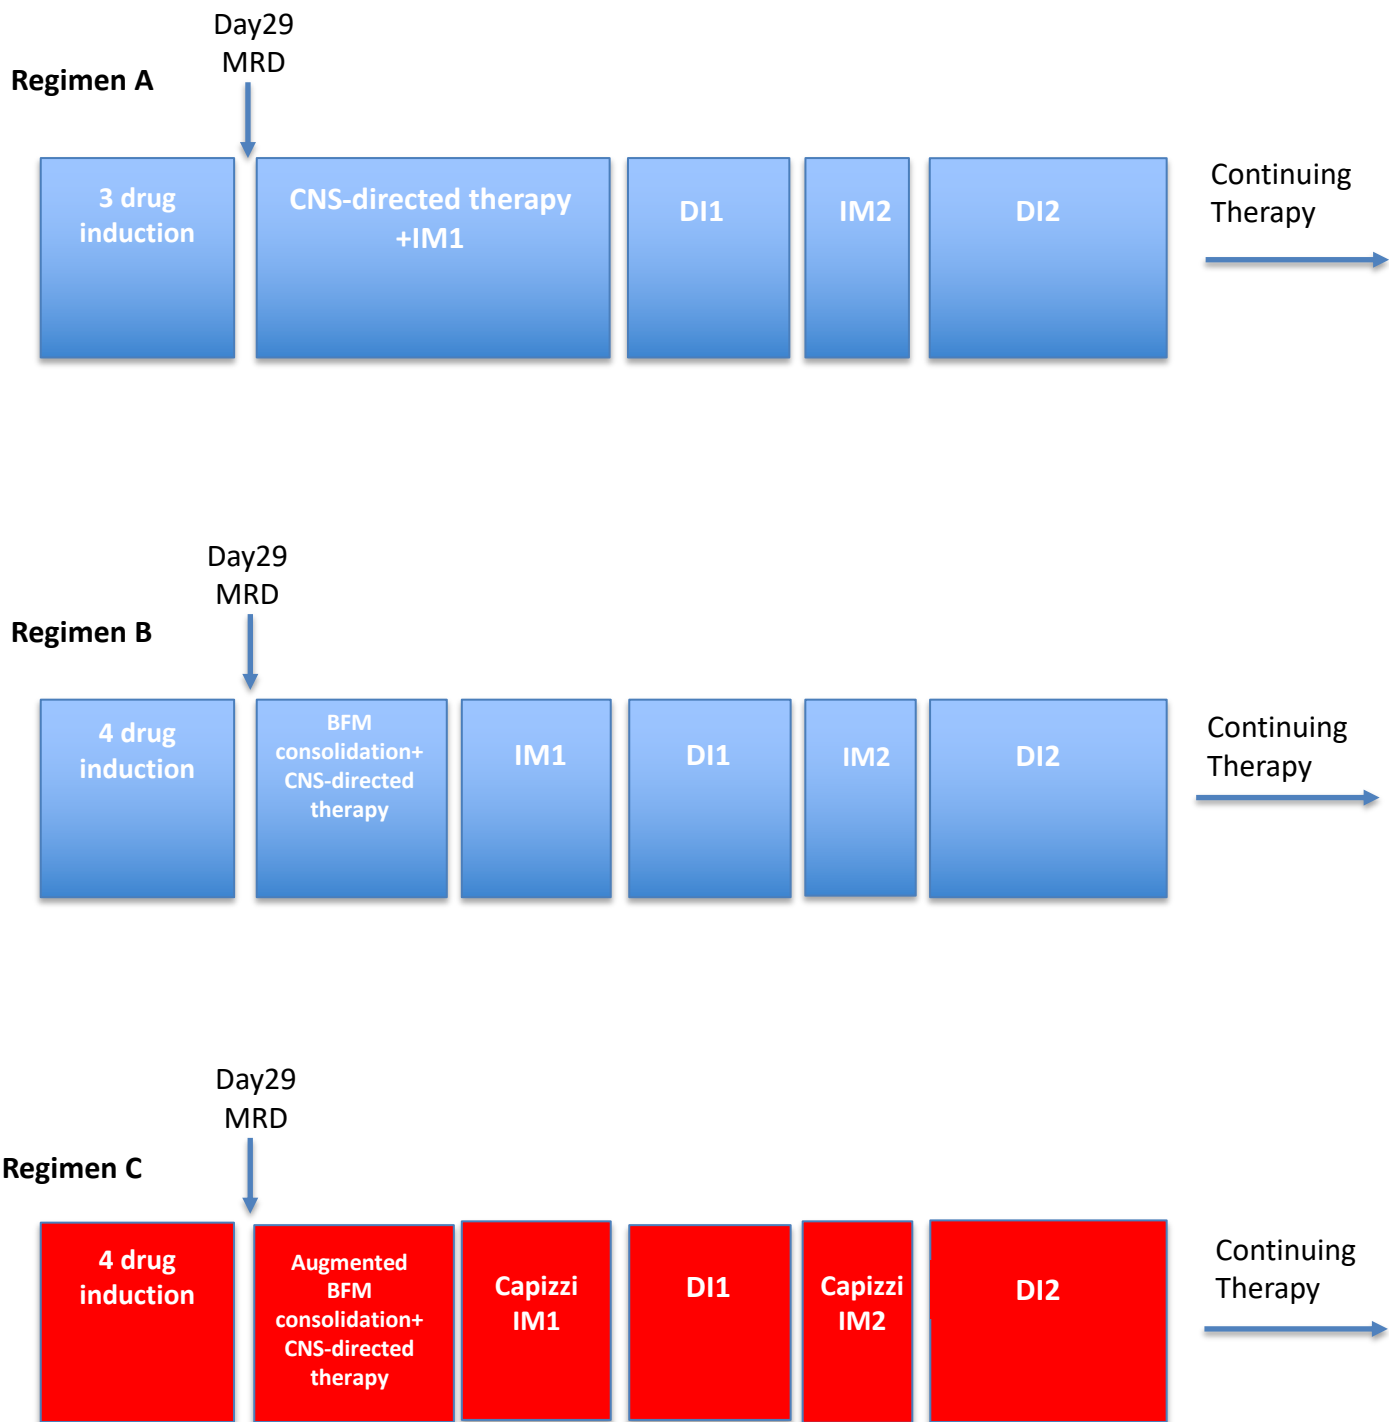

Supplement: 2017.185801.FARAH_SUPPL.pdf [file 2017.185801.FARAH_SUPPL.pdf]
