# Supplementary material
Source: PubMed Central journal article supplement (PMC6029550)
Supplement: 2017_185801-Disclosures_and_Contributions.pdf [file 2017_185801-Disclosures_and_Contributions.pdf]

Haematologica  
HAEMATOL/2017/185801  
Version 3

Prognostic impact of the absence of biallelic deletion at the  $\text{TRG}$  locus for pediatric patients with T-cell acute lymphoblastic leukemia treated on the MRC UKALL2003 trial

Nadine Farah, Amy A. Kirkwood, Sunniyat Rahman, Theresa Leon, Sarah Jenkinson, Rosemary E. Gale, Katharine Patrick, Jeremy Hancock, Sujith Samarasinghe, David C. Linch, Anthony V. Moorman, Nicholas Goulden, Ajay Vora, and Marc R. Mansour

Disclosures: NF was funded by Great Ormond Street Hospital Children's Charity and Cancer Research UK. MRM was funded by Bloodwise. This work was undertaken at UCL which receives a proportion of funding from the Department of Health's NIHR Biomedical Research Centre's funding scheme. Primary childhood leukemia samples used in the study were provided by the Bloodwise Childhood Leukaemia Cell Bank. The trial was funded by the UK Medical Research Council and Leukaemia and Lymphoma Research (now Bloodwise). The authors declare no other conflicts of interest.

Contributions: NF and MRM designed the study. NF, AAK, SR, TL performed the research. NF, AAK, SR, TL and MRM performed the data analysis. NF, AAK, REG, DCL, AVM, AV and MRM contributed to the data interpretation. SJ and REG provided samples. AAK, SJ, REG, KP, JH, SS, AVM, NG, AV provided trial data. NF, AAK, REG, MRM wrote the manuscript. MRM supervised the project.
